# Supplementary material
Source: publisher figshare collection journal article supplement (https://diabetesjournals.figshare.com/ndownloader/files/22670486)
Supplement: Supplementary file 1 [file 22670486]

Pericyte Bridges in Homeostasis and Hyperglycemia

Bruce A. Corliss1, H. Clifton Ray1, Richard W. Doty1, Corbin Mathews1, Natasha Sheybani1, Kathleen Fitzgerald1, Remi Prince1, Molly R. Kelly-Goss1, Walter L. Murfee2, John Chappell3, Gary K. Owens4, Paul A. Yates1,5, Shayn M. Peirce1,5

1Department of Biomedical Engineering, University of Virginia, Charlottesville, Virginia

2Department of Biomedical Engineering, University of Florida, Gainesville, Florida

3Fralin Biomedical Research Institute, Virginia Polytechnic Institute and State University, Blacksburg, VA, USA

4Robert M. Berne Cardiovascular Research Center, University of Virginia, Charlottesville, VA, USA

5Department of Ophthalmometry, UVA School of Medicine, Charlottesville, Virginia

**Short Running Lead**: Pericyte Bridges in Diabetes and Homeostasis

**Corresponding Author**:

Shayn M. Peirce, Ph.D.

Professor

Department of Biomedical Engineering

415 Lane Road

University of Virginia

Charlottesville, VA 22908

**Supplement Contains**

Supplementary Figures 1-7

Supplementary Tables 1-2

Supplementary Notes 1-4

Supplementary Videos 1-2

# Supplementary Figures

**
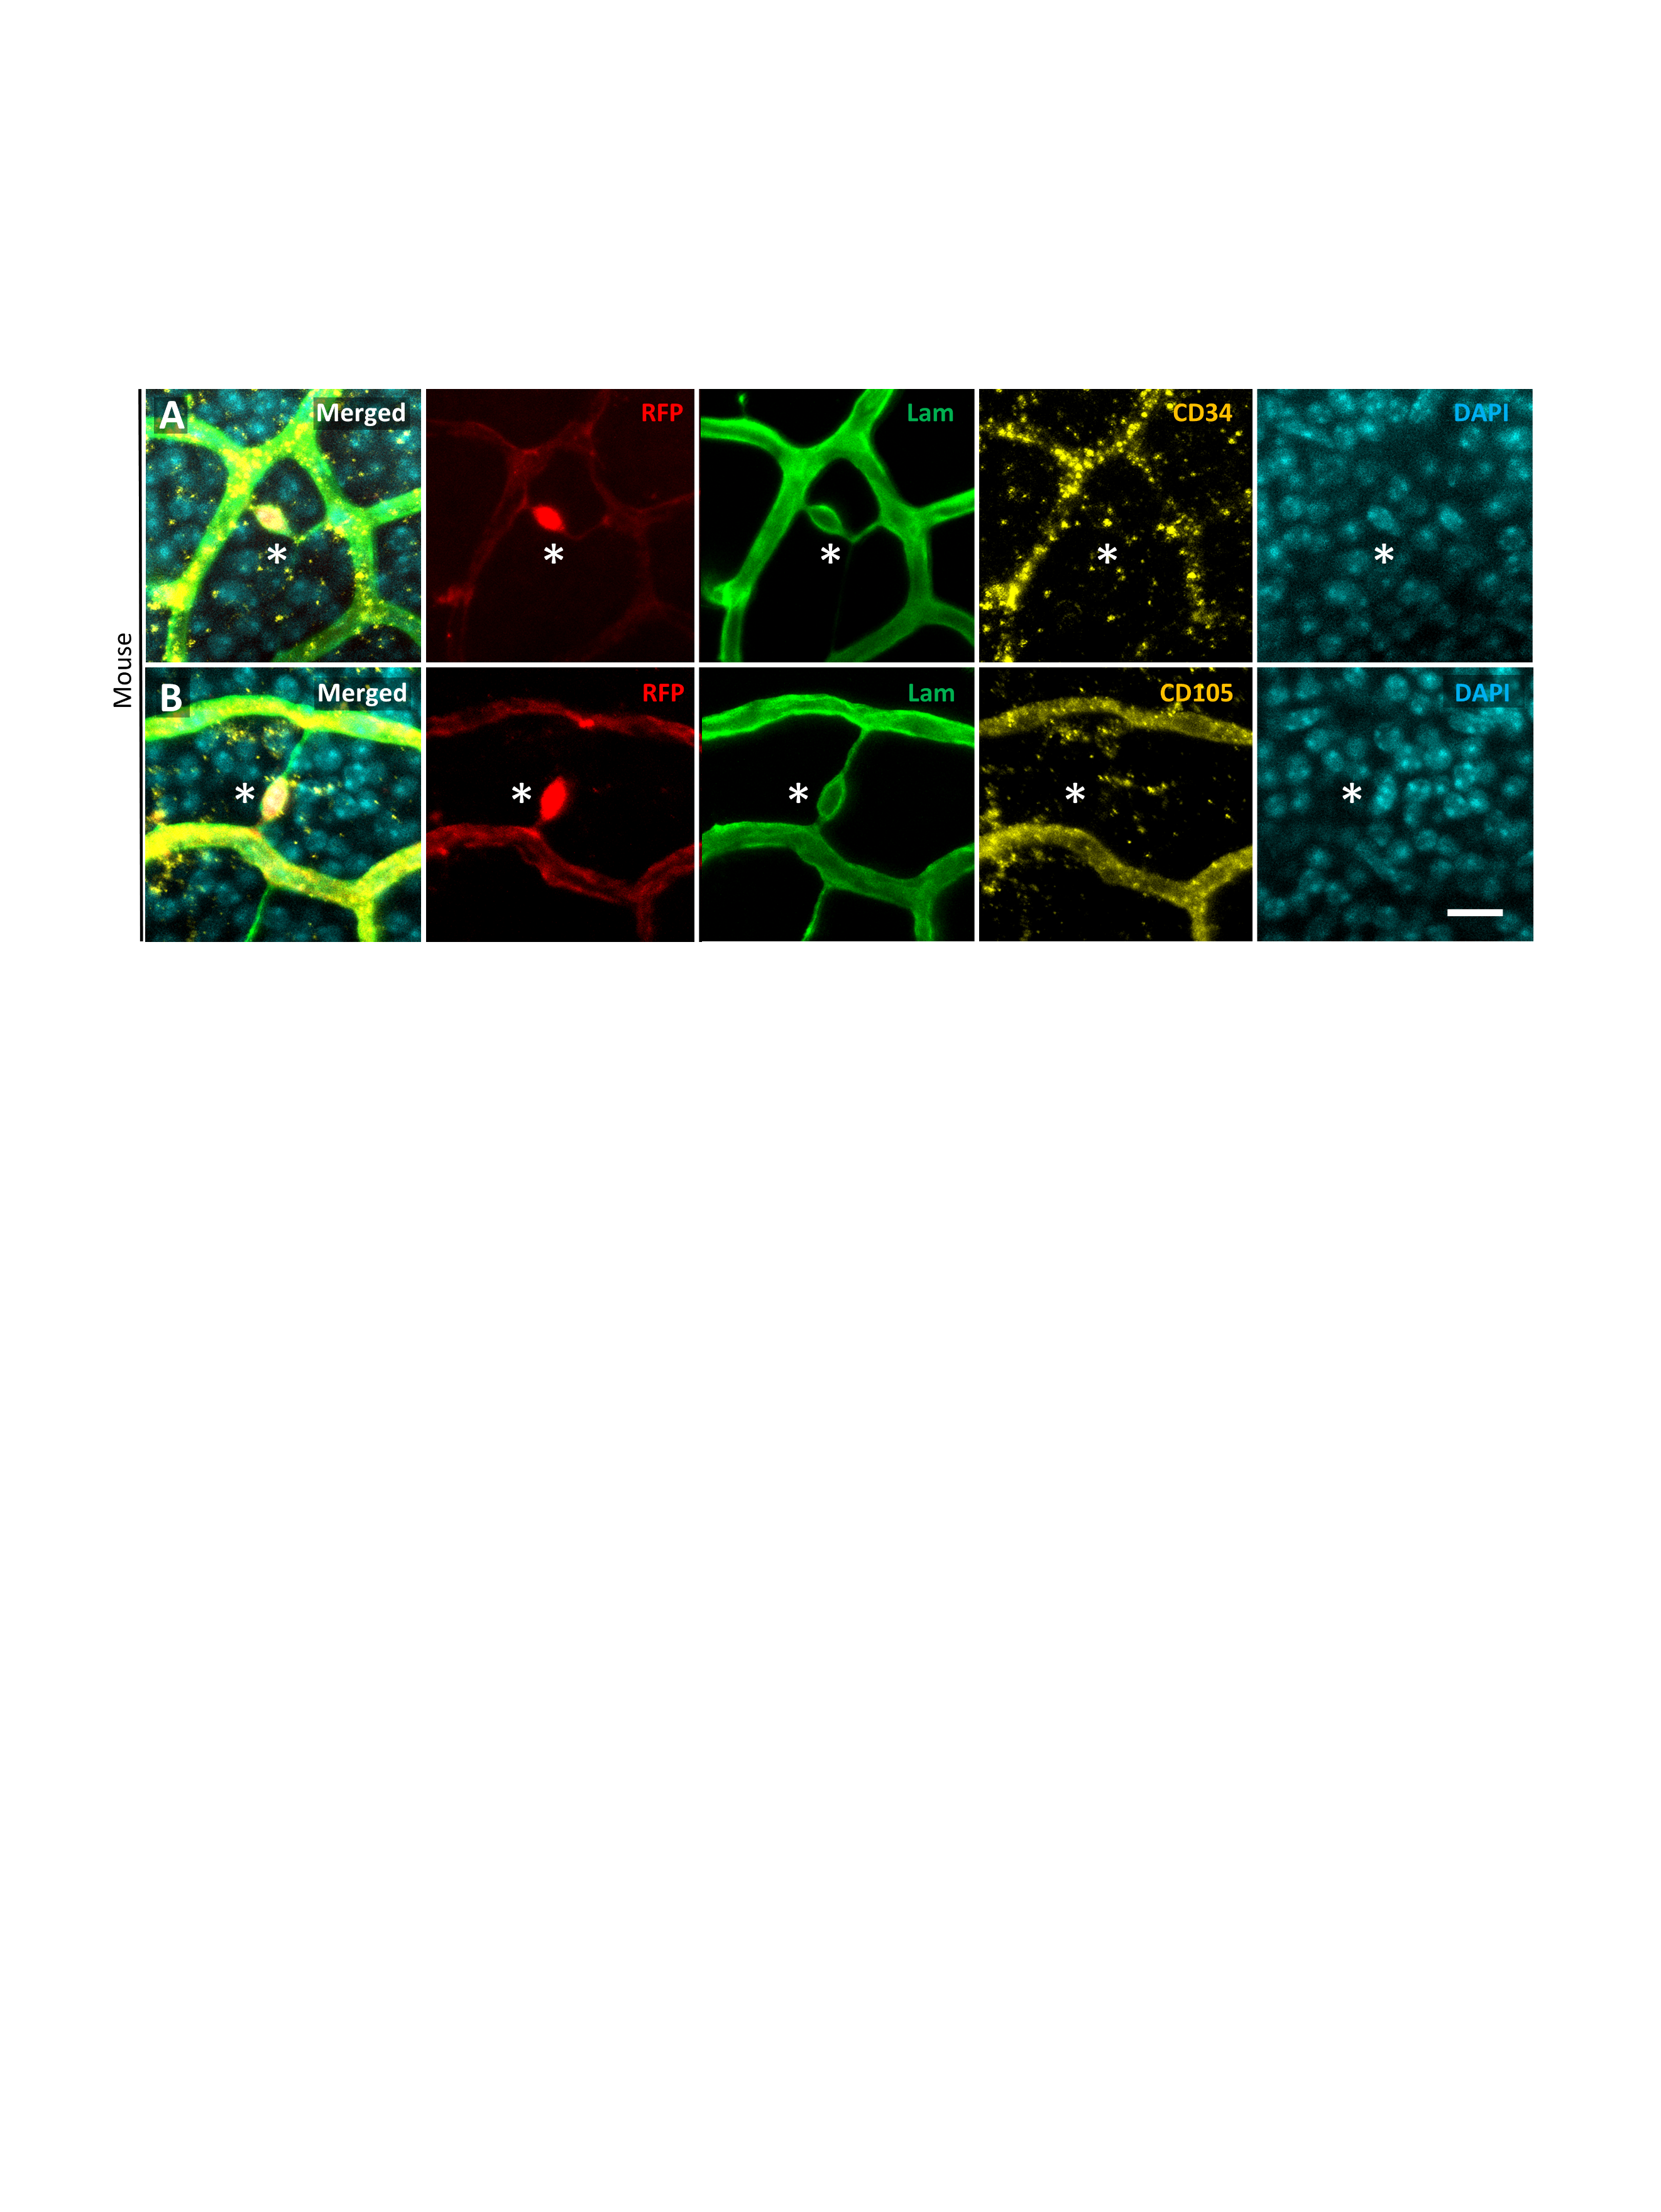
**

**Supplementary Figure 1: Off-vessel Col-IV bridges do not express the endothelial markers CD34 and CD105 in mice**. (**A**) Murine retina of Myh11-RFP mice, with RFP denoting Myh11 lineage-marked cells (red, star), anti-laminin (green), anti-CD34 (yellow), and DAPI nuclei (cyan). (**B**) Murine retina with RFP denoting lineage-marked cells (red, star), anti-laminin (green), anti-CD105 (yellow), and DAPI nuclei (cyan) (scale bar 15 um).


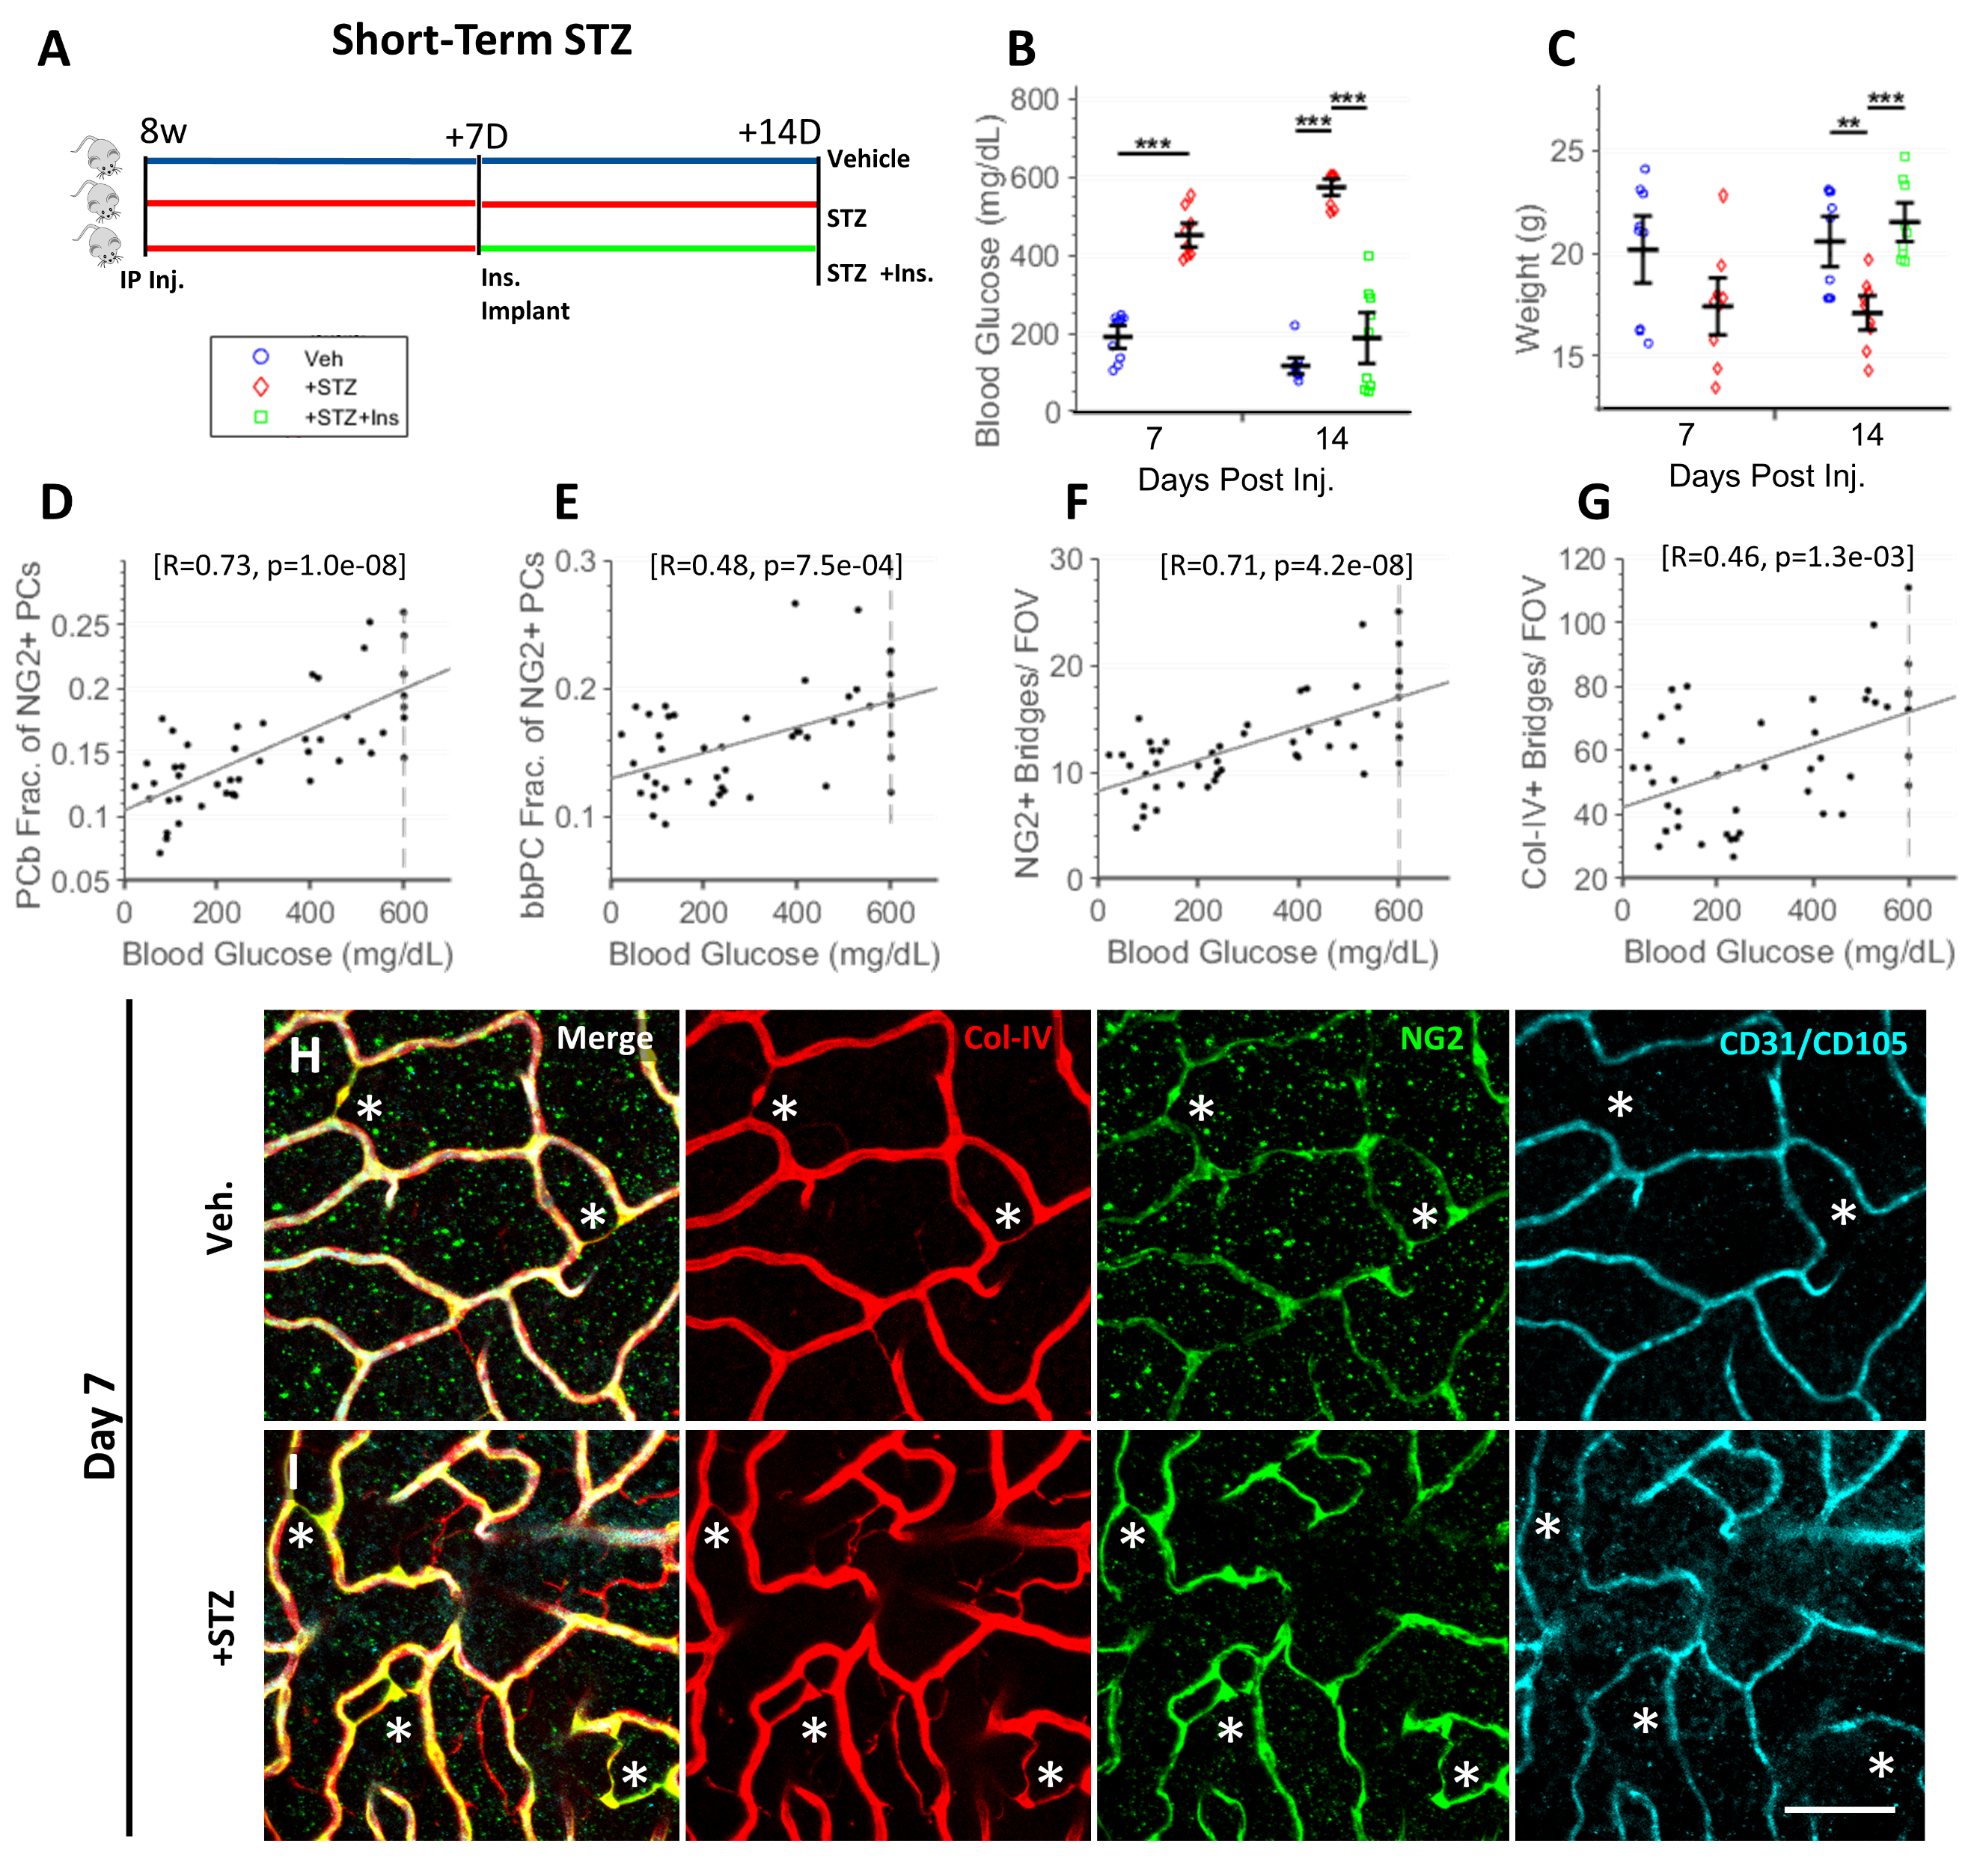
**Supplementary Figure 2:**

**Density of pericyte bridges and basement membrane bridges correlate with blood glucose level at time of sacrifice with short-term diabetes.** (**A**) Experiment design illustrating study groups and timepoints. (**B**) Blood glucose concentrations and (**C**) weight at time of sacrifice for each treatment group (day 7: unpaired t-test, day 14: 1-way ANOVA with Tukey multiple comparisons, N=9 mice). For all mice across treatment groups, Pearson correlation between blood glucose level at harvest and (**D**) fraction of NG2+ pericytes that are pericyte bridges, (**E**) fraction of NG2+ pericytes with basement bridged phenotype, (**F**) NG2+ basement membrane bridges per field of view, and (**G**) all Col-IV+ bridges per field of view (Pearson R value and p value in brackets). (**H, I**) Representative images of retinal deep plexus at day 7 post STZ injection from each treatment group, with anti-Col-IV (red), anti-NG2 (green), along with anti-CD31 and anti-CD105 (cyan), with annotated IBCs (star) (scale bar 50 um).


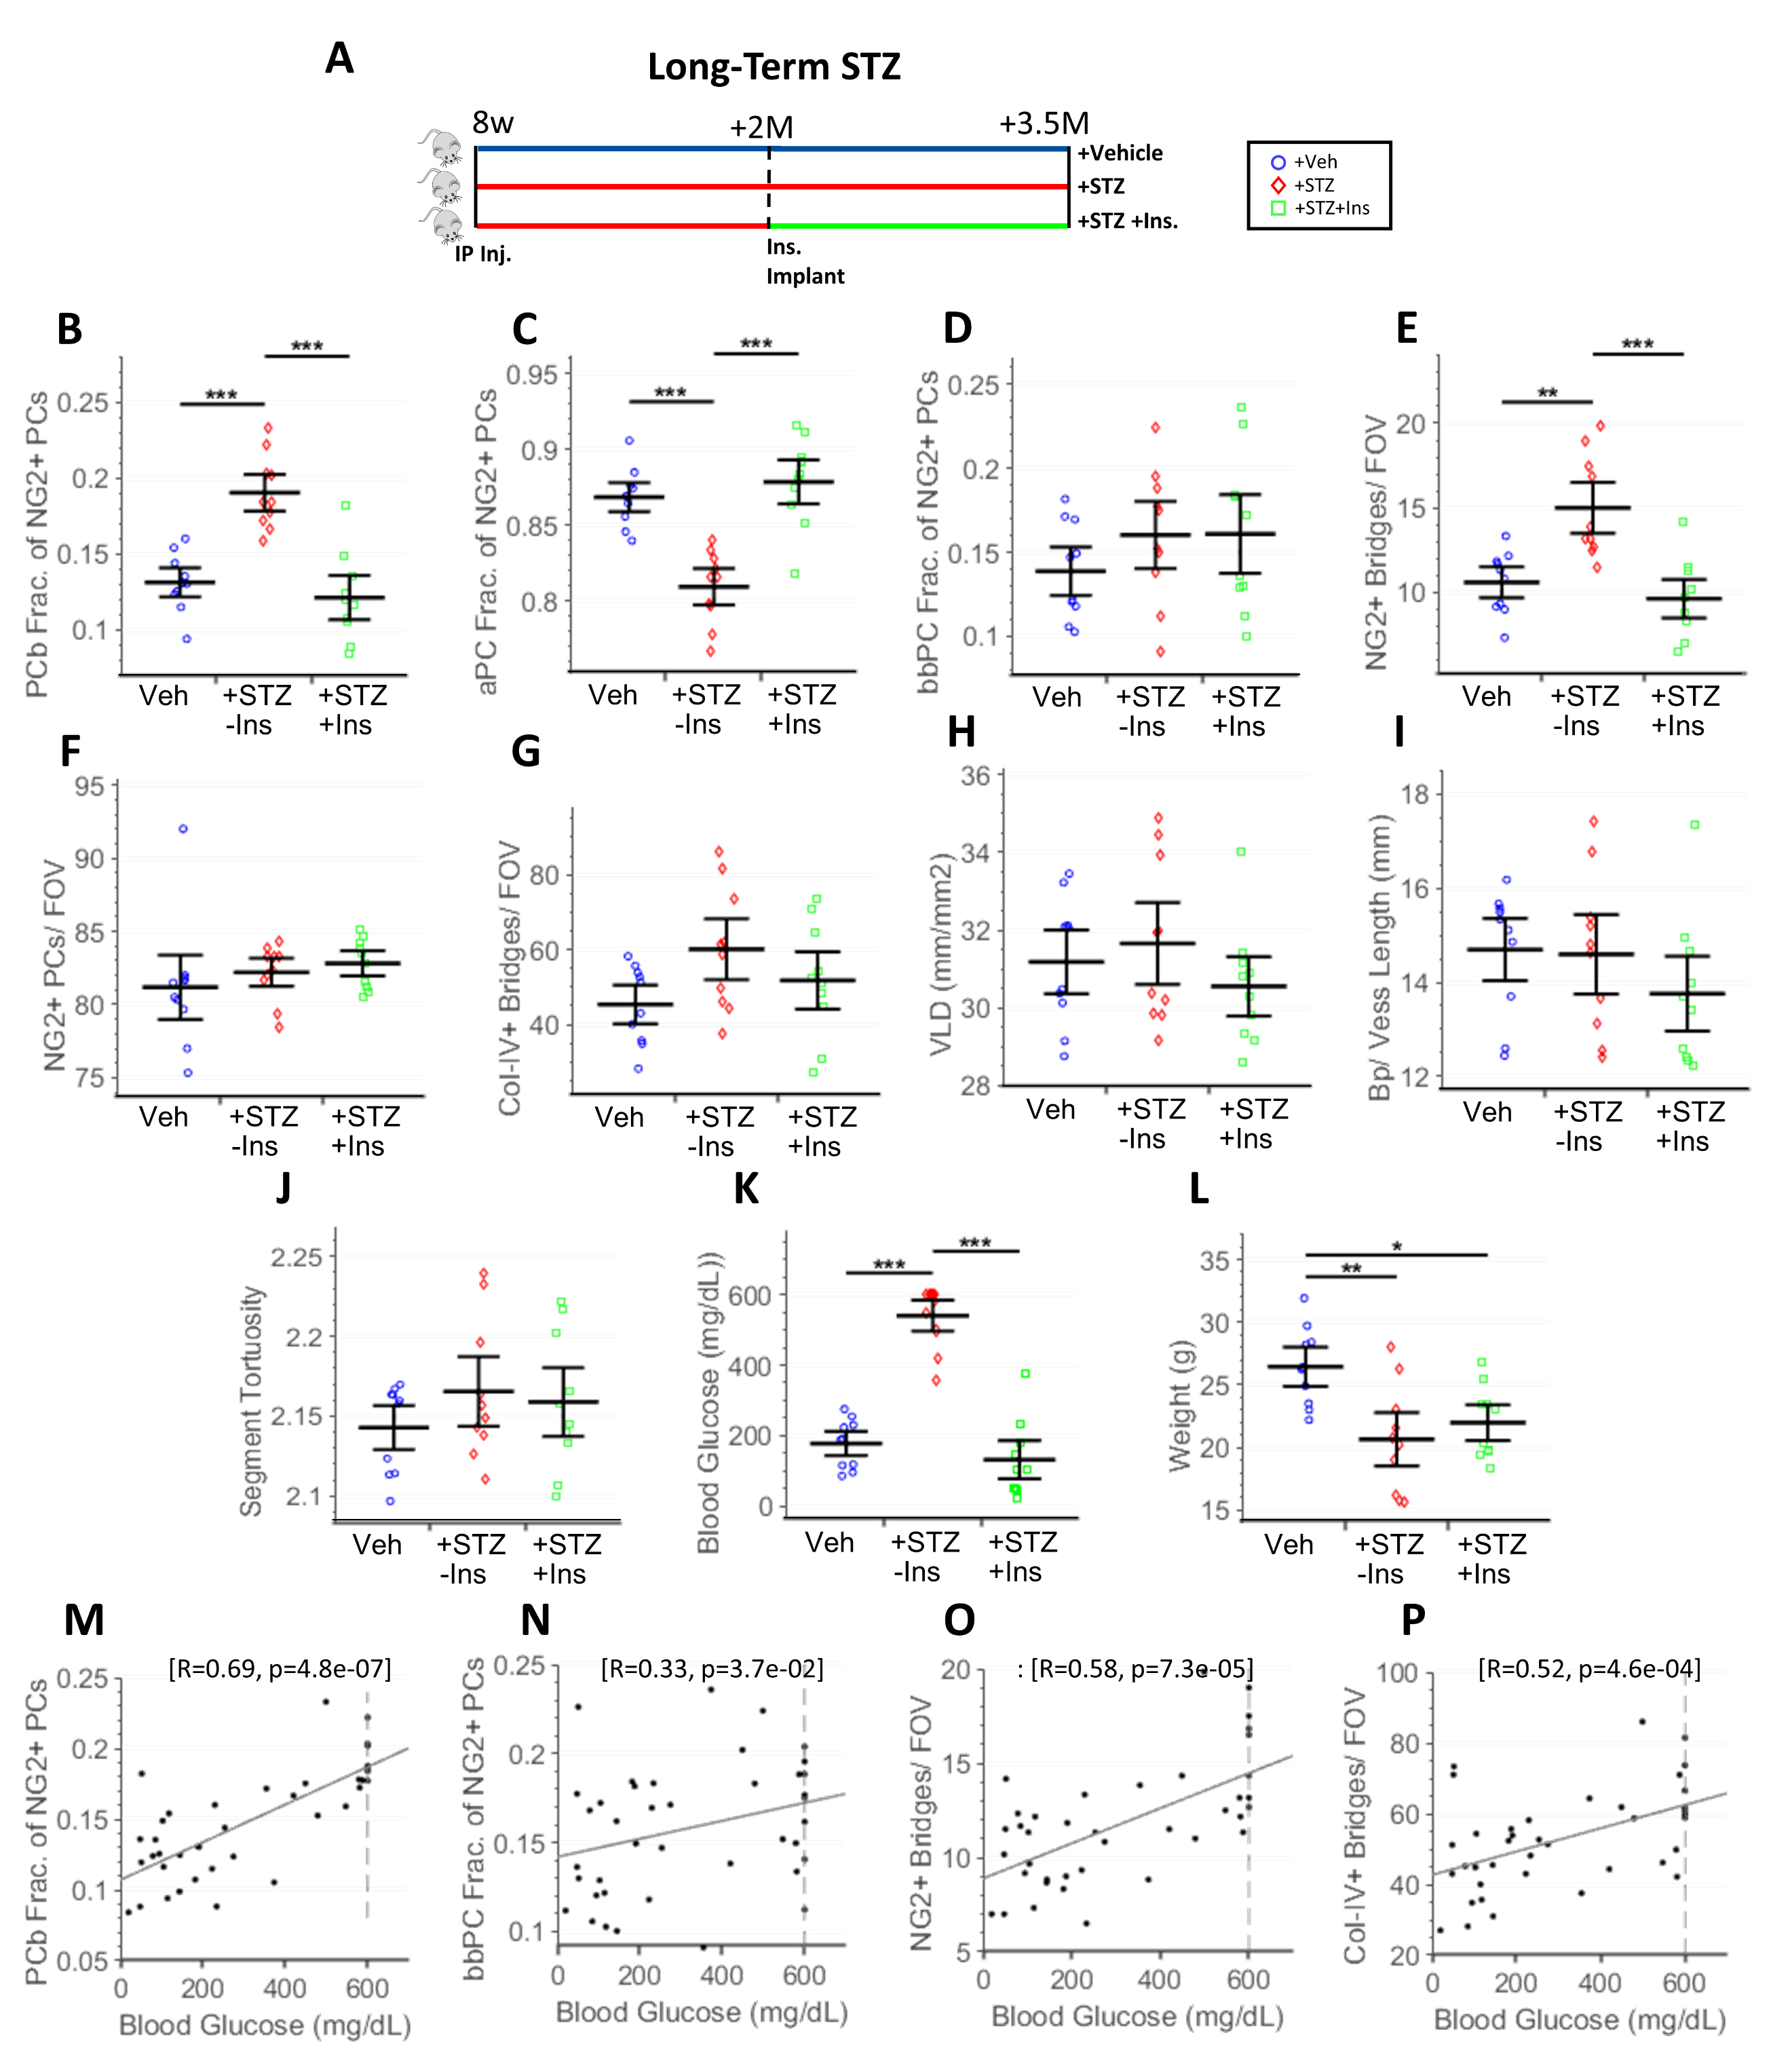


Supplementary Figure 3: **Long-term STZ-induced hyperglycemia has enriched pericyte bridge density normalized with insulin treatment over a static vessel network structure**. (**A**) Experiment design. In the deep retinal plexus, quantification of (**B-G**) pericyte morphology and vessel architecture (**H-K**) resulted in partial rescue of diabetic perivascular phenotype. (**B**) The fraction of NG2+ pericytes that were pericyte bridges in diabetic mice was enriched by 31.0%, while (**C**) the fraction of attached pericytes was reduced 7.3% (1-way ANOVA with Tukey Multiple comparisons, N=9 mice, n=6 images/mouse, p=2.97E-5). Insulin treatment normalized densities with the fraction of pericyte bridges with a 57.0% reduction and the fraction of attached pericytes increased 7.9% (p=2.63E-6). (**D**) There was an insignificant elevation in the fraction of basement bridged pericytes in diabetes and insulin treatment. (**E**) No change was observed in total density of all NG2+ pericytes (p=0.465). (**F-G**) Basement bridges labeled with Col-IV and the NG2 co-labeled subset displayed similar trends as those found with pericyte bridge density across study groups. There was no evidence of angiogenesis or regression, as evidenced by no change to (**H**) vessel length density (p=0.391), (**I**) branchpoints per vessel length (p=0.344), (**J**) segment tortuosity (p=0.420). (**K**) Blood glucose and (**L**) mouse weight confirmed hyperglycemia for each study group. In support of perivascular remodeling, the density of (**M**) pericyte bridges, (**N**) basement-bridged pericytes, and (**O-P**) basement membrane bridges all correlated with blood glucose of each mouse at time of sacrifice (Pearson correlation R values and p-value in brackets).


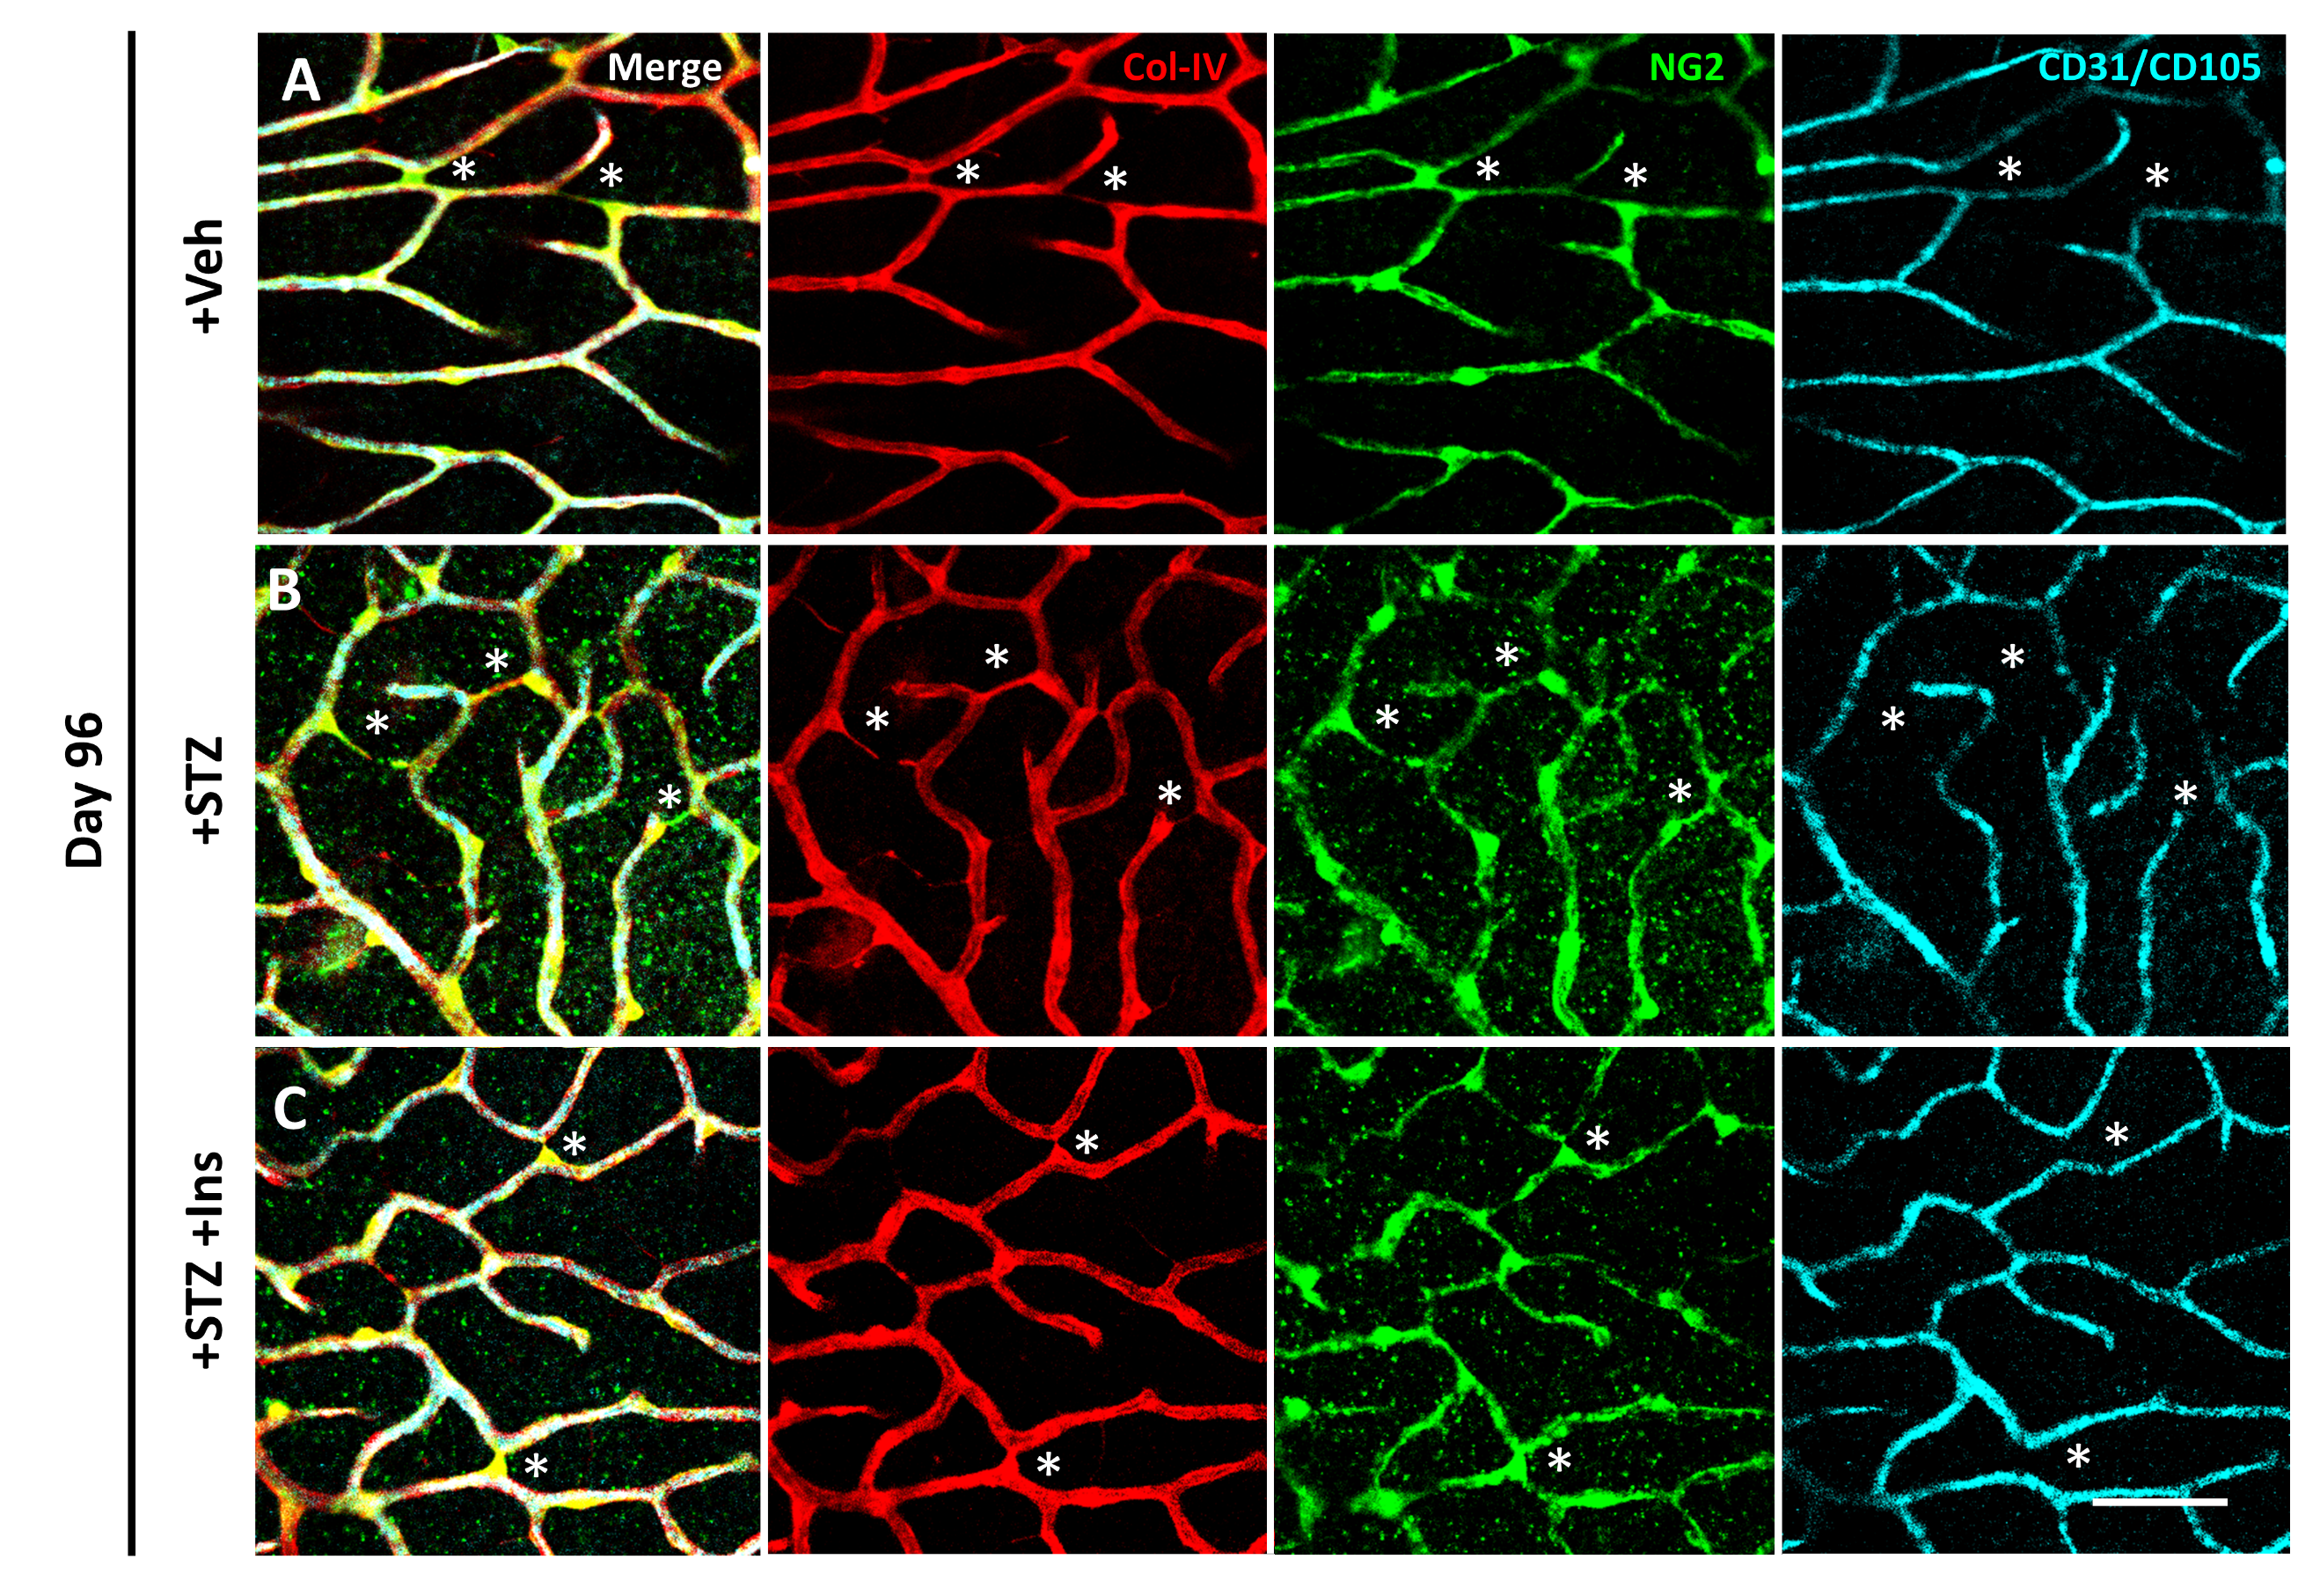


**Supplementary Figure 4:** **Representative images of vasculatures subject to long-term hyperglycemia**. (**A-C**) Representative images of retinal deep plexus at 3.5 months from each treatment group, with anti-COL-IV (red), anti-NG2 (green), along with anti-CD31 and anti-CD105 (cyan), with annotated pericyte bridges (star) (scale bar 50 um).


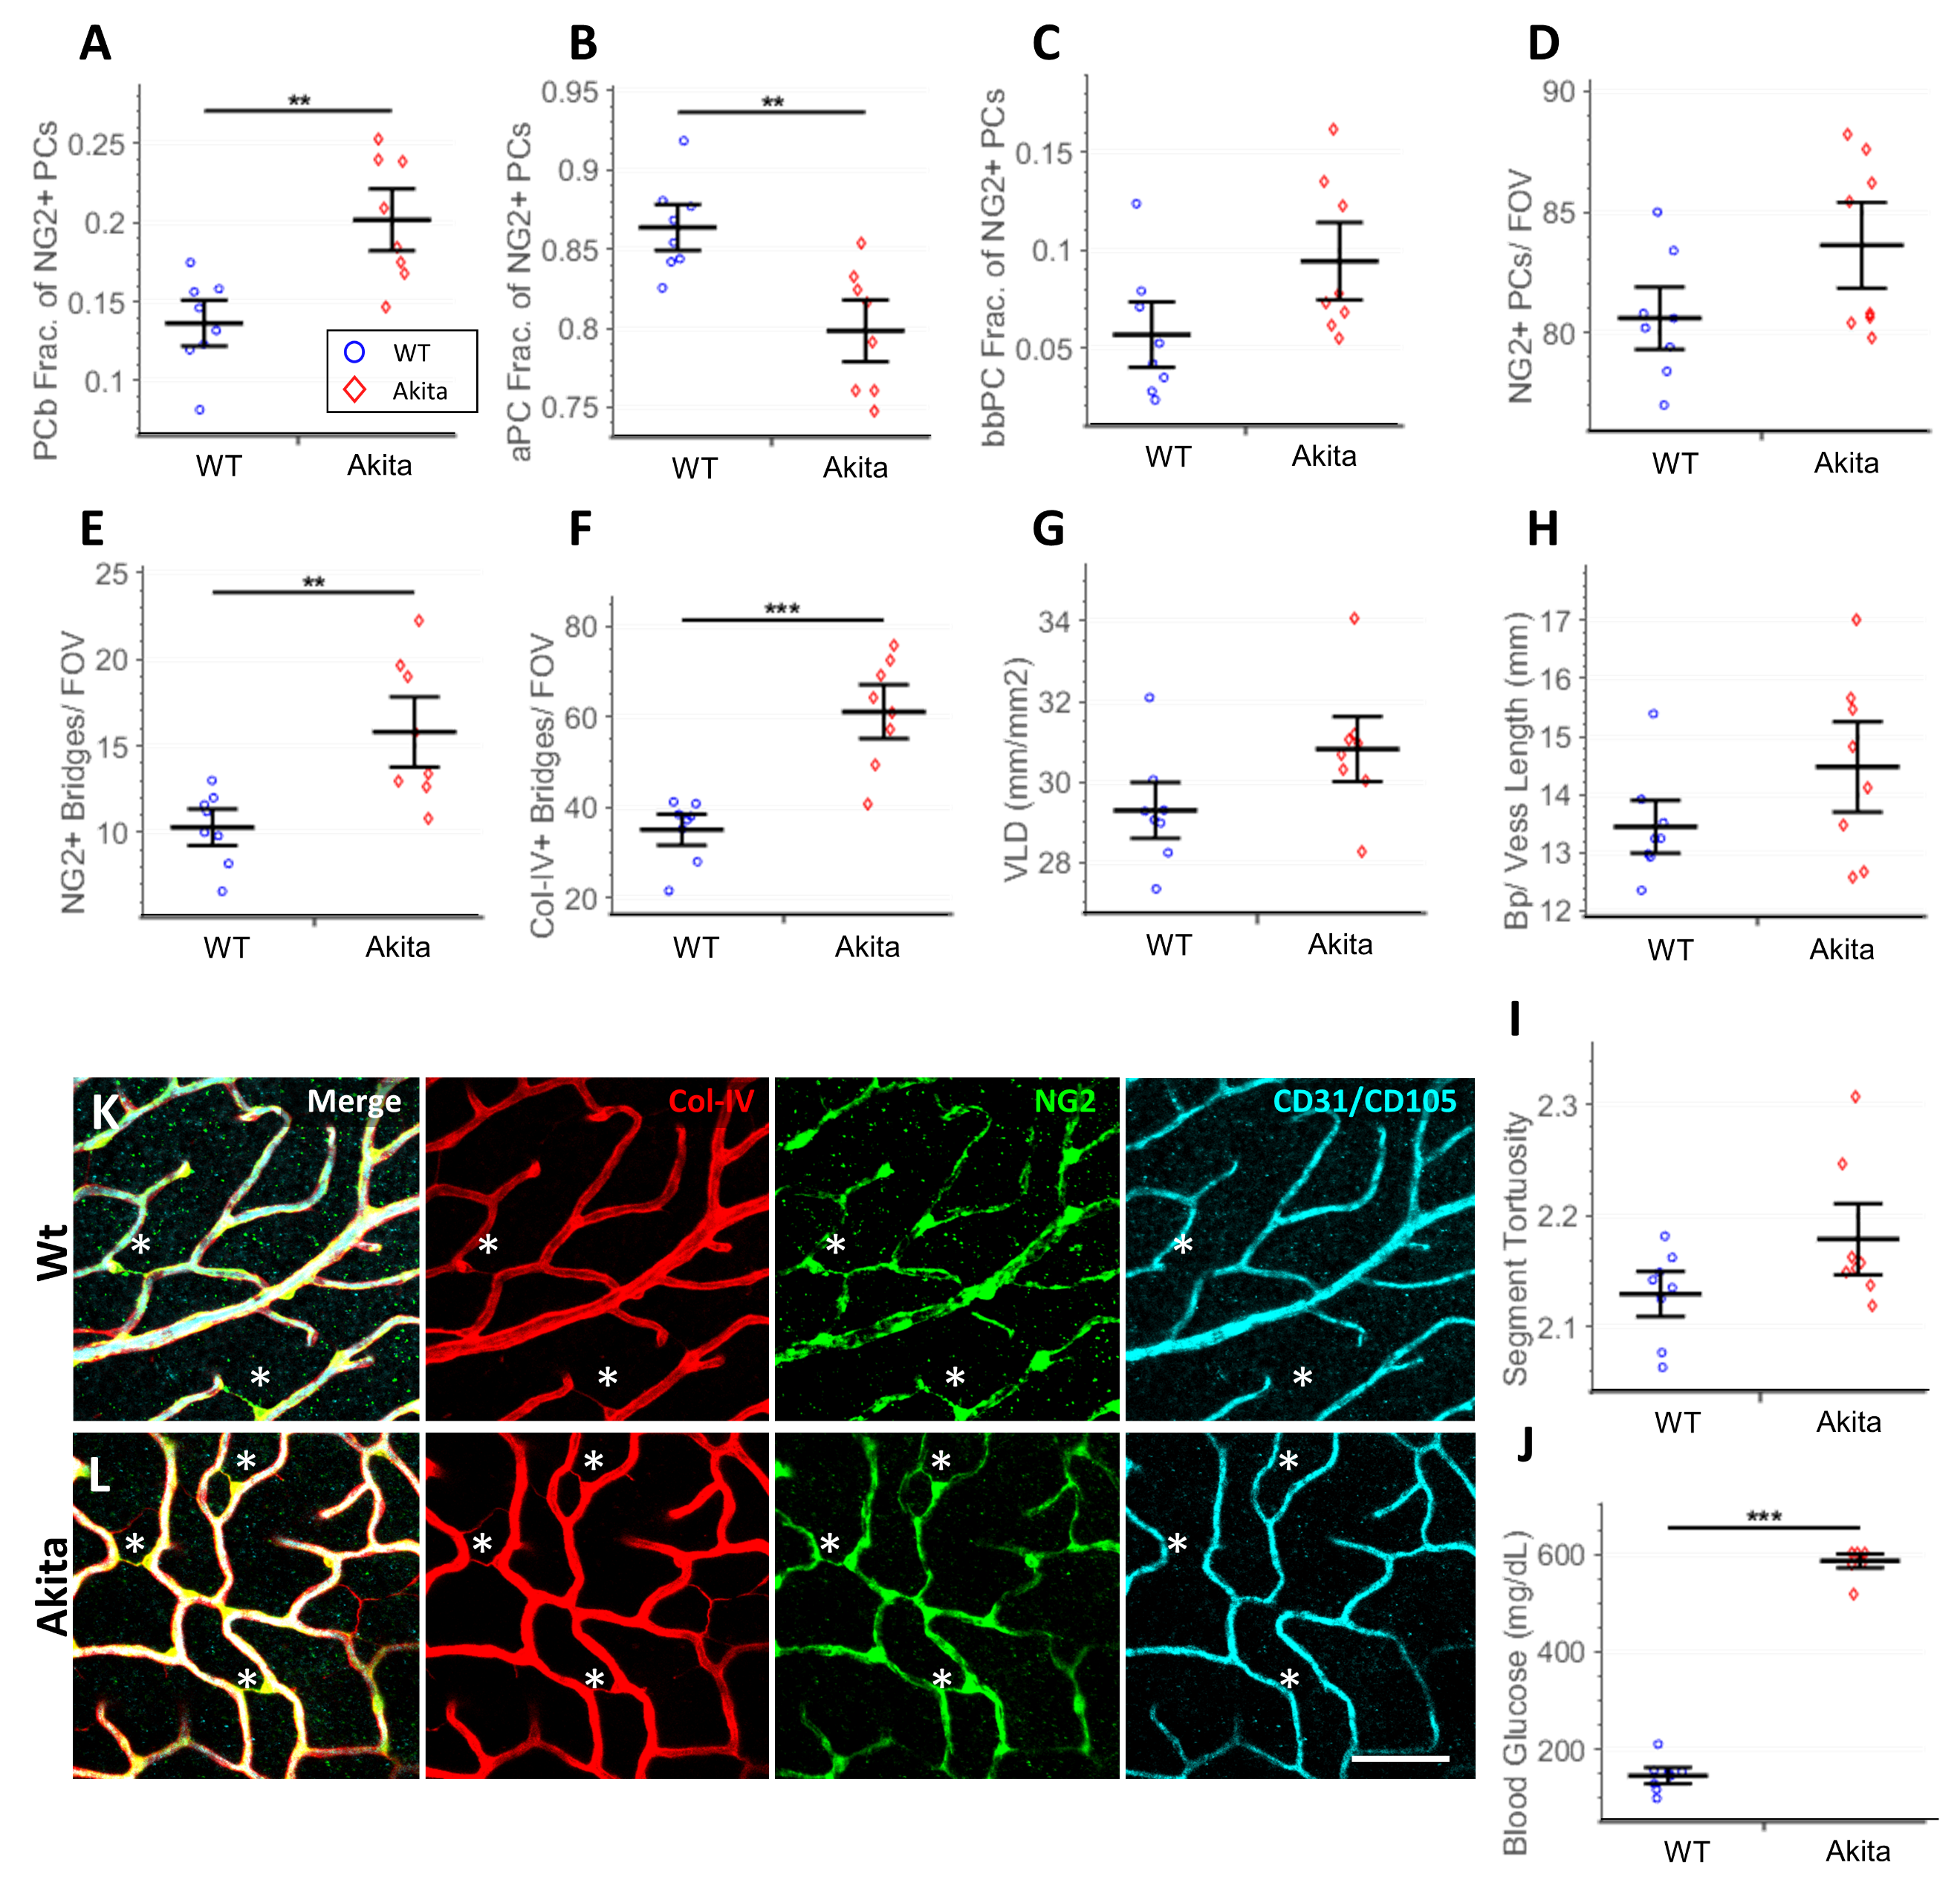


**Supplementary Figure 5:** **Akita mice over the long-term (8 months) exhibit enriched density of pericyte bridges over a morphologically stable vessel network structure with minor remodeling**. In the Ins2Akita genetic mouse model, (**A**) the fraction of NG2+ pericytes that were pericyte bridges was enriched 32.4% at 8 months compared to genetic background (WT) in tandem with (**B**) an 8.2% decrease in the fraction of NG2+ on-vessel attached pericytes (p=1.97E-3, unpaired t-test, N=8 mice, n=5 images/mouse, FOV 530 µm). (**C**) There was a 39.9% increasing trend in the fraction of NG2+ cells with basement bridge pericyte phenotype (p=0.0595). (**D**) Total NG2+ pericytes had an enriched trend with a small effect size of 3.6% (p=0.0720). (**E**) There was a 34.8% increase in NG2+ basement membrane bridges (p=4.22E-3) and (**F**) a 42.6% increase in all Col-IV+ bridges (p=9.89E-5). While there was (**G**) a minor 4.9% enriched trend in vessel length density between Akita and WT (p=0.0627), all other metrics characterizing the vasculature showed no change, including (**H**) branchpoints normalized to vessel length (p=0.128), (**I**) segment tortuosity (p=0.866). (**J**) Blood glucose confirmed the diabetic phenotype seen (**K, L**) in representative images provided.


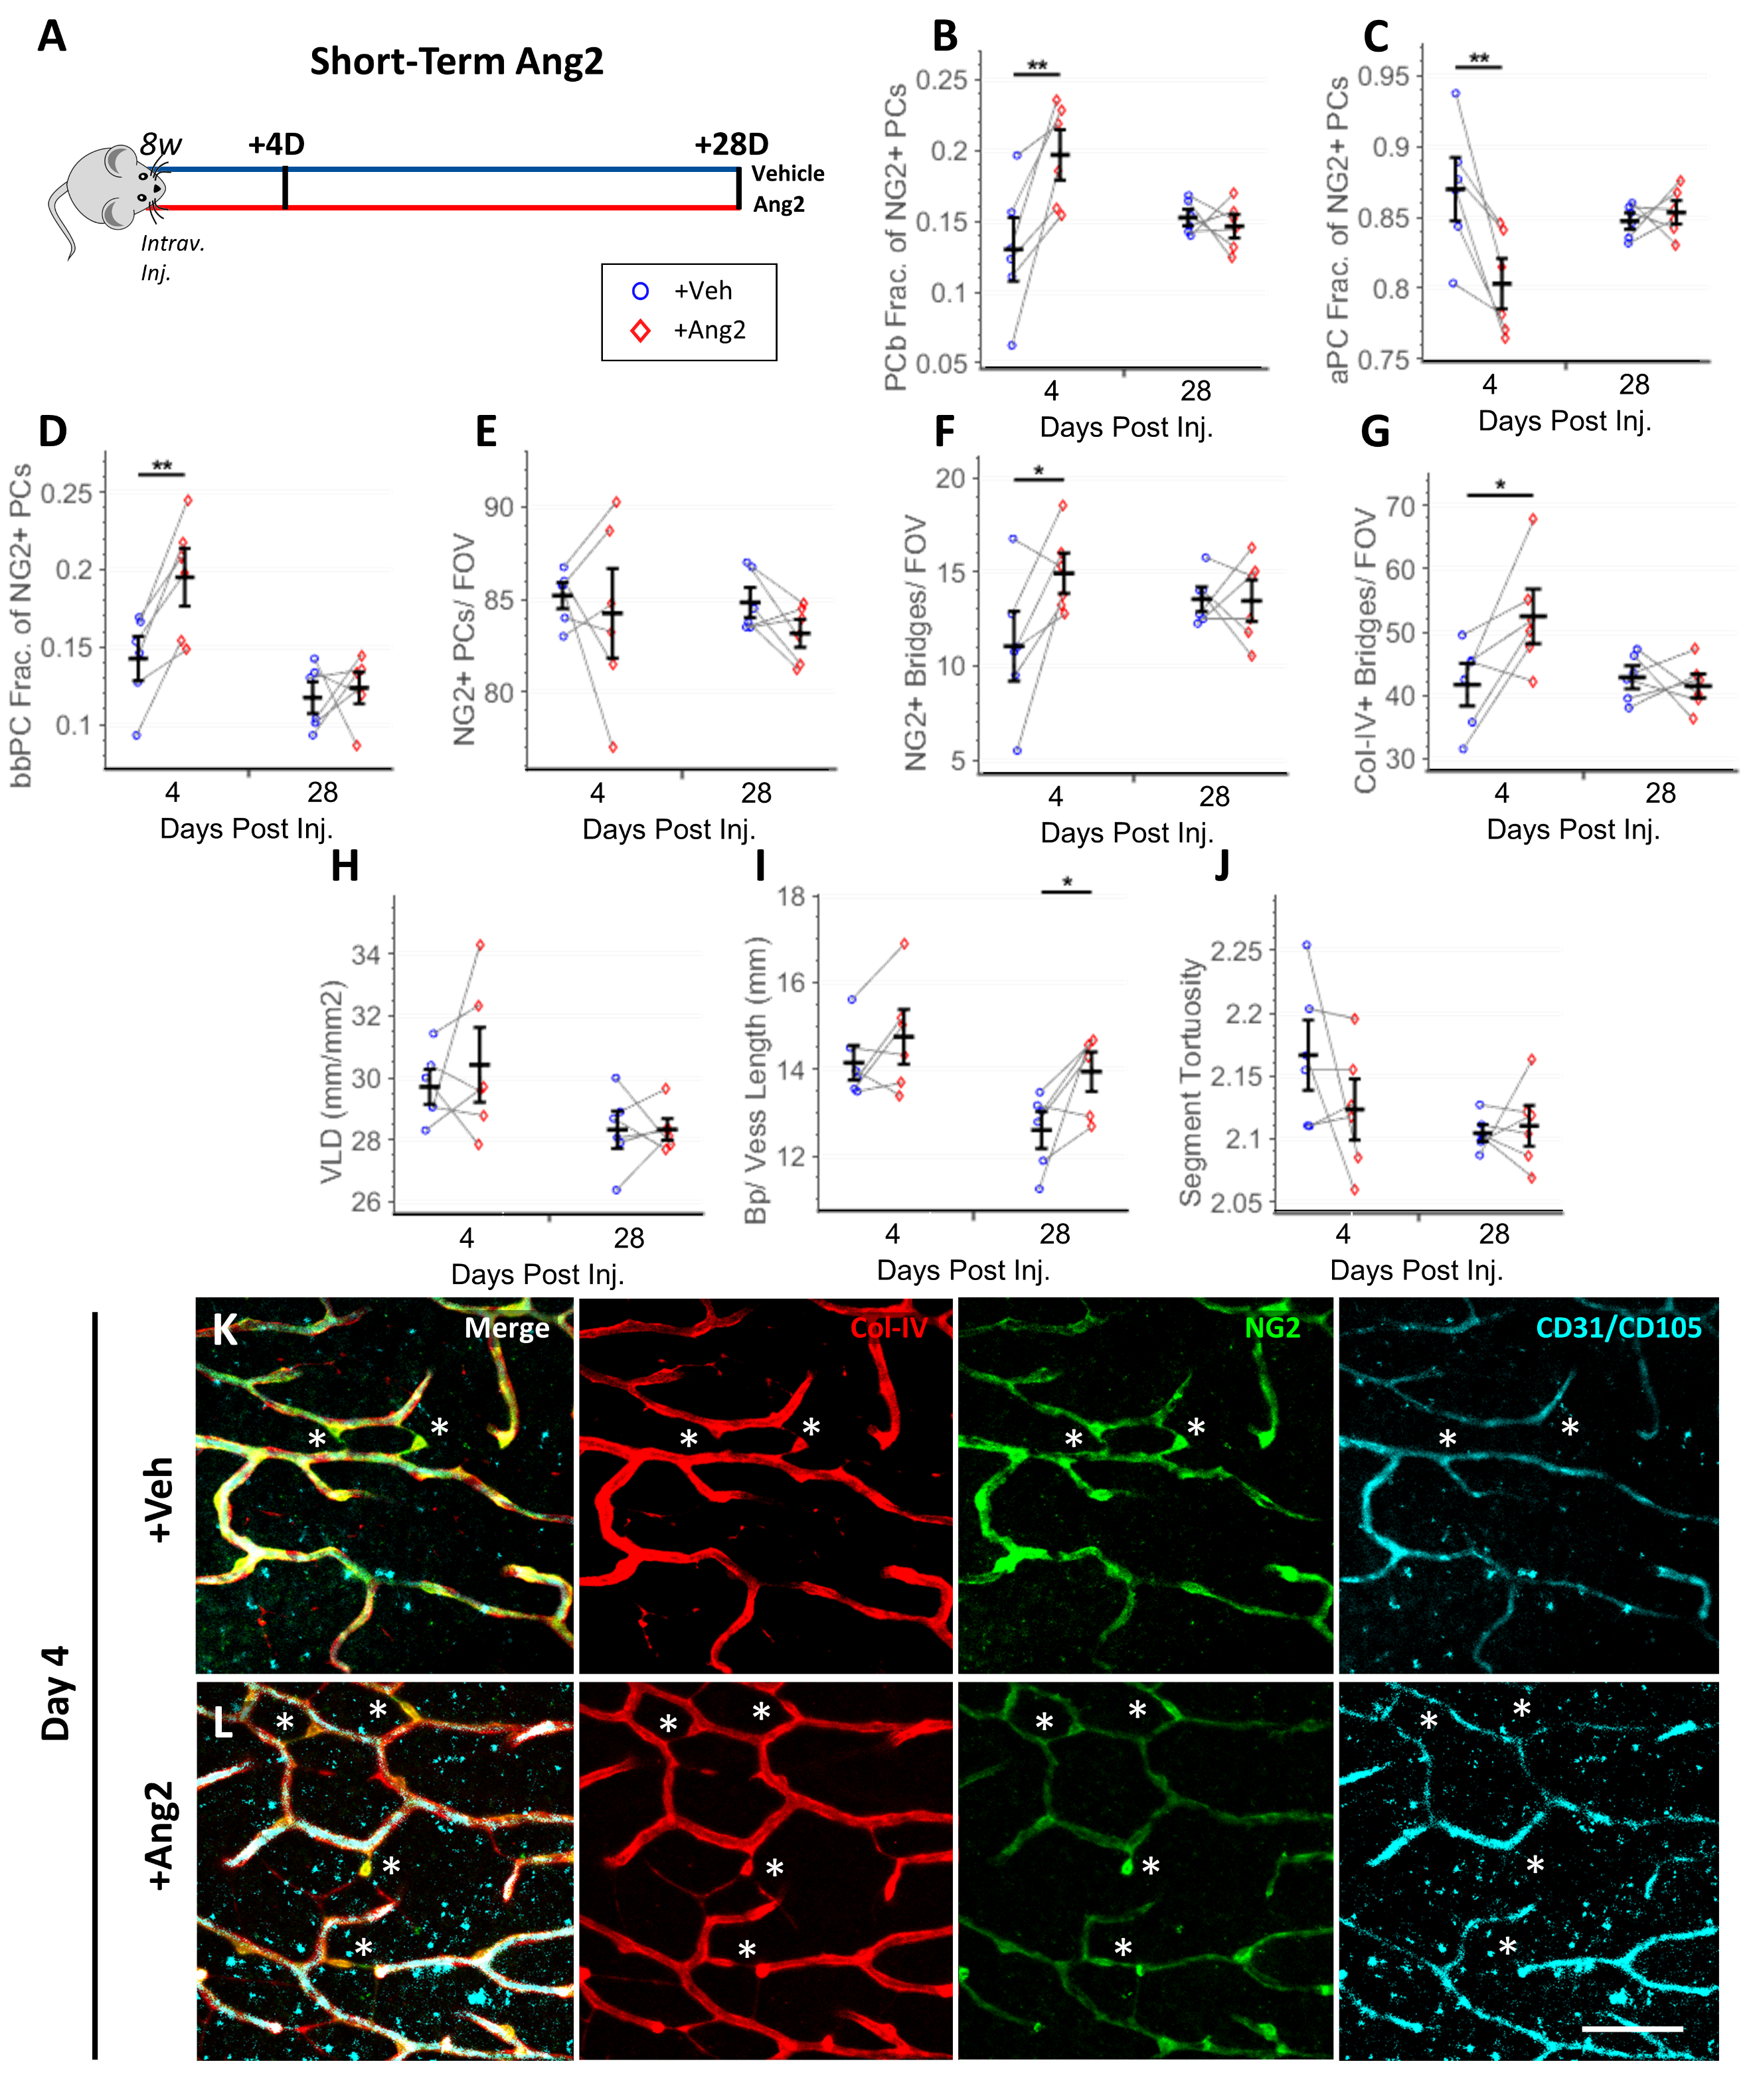


**Supplementary Figure 6: Intravitreal injection of Ang2 exhibits transiently enriched pericyte bridge density over a morphologically static vessel network**. (**A**) Experiment design quantifying pericyte morphology in the retinal deep plexus. (B) The fraction of pericytes that were pericyte bridges was transiently enriched 33.9% relative to vehicle control and (C) attached pericytes were reduced 8.3% (p=9.72E-3, paired two-sided t-test at each timepoint, N=6 mice, n=4 images/mouse, 530 µm FOV). At day 28, both pericyte subpopulations recovered to basal levels (p=0.571). (D) Pericytes with a basement bridged phenotype exhibited the same pattern, with 26.9% enrichment at day 4 (p=1.88E-3) and restoration at day 28 (p=0.697). (**E**) Total NG2-labeled pericyte density remained constant both at days 4 (p=0.647) and 28 (p=0.957). (**F, G**) Basement membrane bridges labeled with Col-IV and the subset colabeled with NG2 followed similar trends as pericyte bridge density across study groups. No angiogenesis was observed at day 4, with (**H**) vessel length density (p=0.525), (**I**) branchpoints per vessel length (p=0.158), (**J**) segment tortuosity (p=0.225), remaining unchanged. Representative images from (**K, L**) day 4 are provided with anti-Col-IV (red), anti-NG2 (green), along with anti-CD31 and anti-CD105 (cyan), with annotated pericyte bridges (star) (scale bar 50 um).


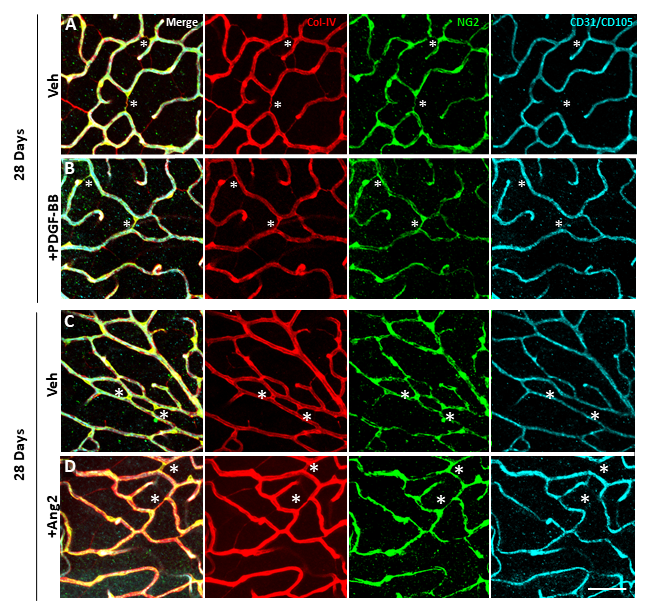


**Supplementary Figure 7: Vascular network is normalized 28 days post injection of PDGF-BB and Ang2.** (**A, B**) representative images from both study groups 28 days after injection of PDGF-BB, with anti-Col-IV (red), anti-NG2 (green), along with anti-CD105 and anti-CD31 (cyan). (**C, D**) representative images from both study groups 28 days after injection of Ang2, with anti-Col-IV (red), anti-NG2 (green), along with anti-CD105 and anti-CD31 (cyan), with pericyte bridges annotated (star) (scale bar 25 µm).

# Supplementary Tables

## Table 1: Primary Antibodies

| **Target/Name** | **Imm. Species** | **Host Species** | **Company** | **Cat #** | **Dilution** |
| --- | --- | --- | --- | --- | --- |
| Anti-NG2 | Rat | Rabbit | Millpore, Darmstadt, Germany | AB5320 | 1:200 |
| Anti-Collagen-IV | Human | Goat | Bio-rad, Oxford, UK | 13400 | 1:100 |
| Isolectin GS-IB4 | - | Griffonia simplicifolia | Life Technologies, Carlsbad, CA | I32450 | 1:150 |
| DAPI | - | - | ThermoFisher Scientific, Waltham, MA | D1306 | 1:500 |
| Anti-CD34 | Mouse | Rat | Biolegend, San Diego, CA | 119301 | 1:200 |
| Anti-CD105 | Mouse | Rat | Biolegend, San Diego, CA | 120402 | 1:200 |
| Anti-Laminan [AF488] | Mouse | Rabbit | Novus, Saint Charles, MO | NB300-144AF488 | 1:100 |
| Anti-Fibronectin | Mouse | Rabbit | Abcam, Cambridge, UK | AB2033 | 1:200 |
| Anti-RFP | - | Rabbit | Abcam, Cambridge, UK | AB62341 | 1:200 |
| Anti-CD31 | Human | Mouse | Biolegend, San Diego, CA | 910005 | 1:200 |
| Anti-CD31 | Mouse | Rat | Biolegend, San Diego, CA | 102504 | 1:300 |
| Anti-Myh11 | Mouse | Rat | Kamiya Biomedical Company, Seattle, WA | MC-352 | 1:300 |
| Anti-GFP [AF647] | *Aequorea victoria* | Rabbit | Life Technologies, Carlsbad, CA | A-31852 | 1:150 |
| Anti-IBA1 | Rat | Goat | Abcam, Cambridge, UK | AB107159 | 1:200 |

## Table 2: Secondary Antibodies

| **Host** | **Target** | **Flour** | **Company** | **Cat #** | **Dilution** |
| --- | --- | --- | --- | --- | --- |
| Donkey | Rabbit IgG | AF546 | Invitrogen, Carlsbad, CA | A10040 | 1:600 |
| Donkey | Rabbit IgG | AF647 | ThermoFisher, Waltham, MA | A-31573 | 1:600 |
| Donkey | Rat IgG | AF488 | Invitrogen, Carlsbad, CA | A-21208 | 1:600 |
| Donkey | Rat IgG | AF647 | Abcam, Cambridge, United Kingdom | AB150155 | 1:600 |
| Donkey | Goat IgG | AF546 | Invitrogen, Carlsbad, CA | A11056 | 1:600 |
| Donkey | Goat IgG | AF647 | Invitrogen, Carlsbad, CA | A21447 | 1:600 |

# Supplementary Notes

## Supplementary Notes 1: Mouse Treatments

With the lineage tracing mice used, cre recombinase was activated in male mice with a series of ten 1-mg intraperitoneal injections of tamoxifen (Sigma, cat. #. T-5648,) from 6 to 8 weeks of age, for a total of 10 mg tamoxifen/mouse. Animals were allowed to recover for ≥4 weeks to allow residual tamoxifen to leave the system before experiments/tissue isolation.

For STZ induced diabetes, at 7 weeks of age, glucose was taken for all mice after a 2 hour fast to establish a baseline glucose level. At 8 weeks, mice were injected interperitoneally with filter sterilized 200 mg/kg STZ (Sigma, Cat. # 85882) in 0.1 M Citrate buffer to initiate severe hyperglycemia, or simply given vehicle control. Mice were fasted for 4 hours prior to injection, and provided with 10% sucrose for drinking water overnight. Glucose was again taken a week after injection after a 2 hour fast to confirm hyperglycemia with blood glucose above 300 mg/dL. For the duration of experiment, blood glucose and body weight were checked twice a week with a glucose meter (Bayer, Pittsburgh, PA, cat. # 9628) and diabetic mice were injected with up to 1 unit of Humulin-N (Ely Lilly, USA) as necessary to maintain body weight. Maximum measurement for glucose meter saturated at 600 mg/dL, so measurements about that value were recorded as max value. To examine the effects of normalizing glucose levels in diabetic mice and eliminating the effects of vascular injury from STZ directly causing vascular remodeling, the insulin treatment group was implanted with Linbit insulin implants (Linbit, Cat. # Pr-1-B, Ontario, Canada) via subcutaneous injection following manufacturer’s instructions. Additional implants were added through time to bring blood glucose levels below 300 mg/dL in two consecutive readings in order to normalize hyperglycemia. Mice without insulin implants (STZ diabetic and vehicle) were given sham injections to mimic the injury from implantation.

## Supplementary Notes 2: Intravitreal Injections of Ang2 and PDGF-BB

Mice were anesthetized with using inhalation of 2% isoflurane/oxygen (Henry Schein Animal Health, Dublin, Ohio, cat. # 029405). A drop of sterile 0.5% Proparacaine hydrochloride ophthalmic solution (Henry Schein Animal Health, Dublin, Ohio, cat. # 1127199) was added as a topical anesthetic to numb the eye before injection. For the Ang2 experiments, mice were intravitreally injected in one eye with 1.5 µL of 0.67 µg/µL of carrier-free recombinant human Ang2 (R and D Biosystems, Minneapolis, MN, cat. # 623-AN-025/CF), in PBS, and the other eye 1.5 µL of PBS to act as contralateral control. For the PDGF-BB experiments, mice were intravitreally injected in one eye with 1.5 µL of 2 µg/µL of carrier free recombinant mouse PDGF-BB (Shenandoah Biotechnology, Warwick, PA, cat. # 200-58-100ug) in sterile water, and the other eye 1.5 µL of sterile water to act as contralateral control. To carry out intravitreal injections, a 30G needle (Becton Dickerson, Franklin Lakes, NJ, cat. # 305128) was used to initially poke through the sclera, followed the injection with a Hamilton syringe (Hamilton Company, Reno, NV 7633-01,65 RN) with a Hamilton 33G needle (Hamilton Company, Reno, NV, cat. #7803-05, PT4).

## Supplementary Notes 3: Retina Imaging, Harvest, and Immunostaining

For live imaging, animals were anesthetized with an intraperitoneal injection of ketamine/xylazine/atropine (60/4/0.2 mg/kg body weight) (Zoetis; Kalamazoo, MI/West-Ward; Eatontown, NJ/Lloyd Laboratories; Shenandoah, IA). A drop of sterile 0.5% Proparacaine hydrochloride ophthalmic solution was added as a topical anesthetic to numb the eye before injection. To allow visualization of vascular endothelium, anesthetized mice were administered a retro-orbital injection of labeled isolectin (IB4-Alexa647; Life Technologies, Carlsbad, CA) 30 minutes before sacrifice. Animals were then mounted on a microscope stage and imaged with a Nikon point scanning confocal (Nikon Instruments Incorporated, Melville, NY; Model TE200-E2; 10X air objective) while kept unconscious with isoflurane anesthesia and a heating pad to maintain body weight. Mice were sacrificed at the end of the imaging session. For histological imaging, high resolution imaging was carried out on a Zeiss LSM 880 with a 63x Plan-Achromat/1.40 oil DIC. Imaging for quantification of vasculature and pericyte phenotype was carried out with a Nikon point scanning confocal (Nikon Instruments Incorporated, Melville, NY; Model TE200-E2) with a Plan Flour 20X/0.75 oil immersion objective.

Mice were sacrificed via CO2 asphyxiation with cervical dislocation for secondary sacrifice, eyes enucleated, and incubated in 4% PFA for 10 minutes, and retinas surgically isolated. Tissue was permeabilized with 1 mg/mL digitonin for 2 hours (Sigma, cat. # D141-500MG), immunostained with the same concentration of digitonin for all steps left overnight at 4 °C, and washed with 0.1% saponin solution in between (Sigma, cat. # 84510-100G). Primary antibodies are listed in Table 1, and secondary antibodies in Table 2. For staining with NG2 and Col-IV, retinas were subject to proteinase-K digestion (Roche, cat. # 03-115-828-001) after fixation to aid with antibody penetration (see main text for reference). All images were acquired from deep retinal plexus approximately mid-distance radially between the optic disk and peripheral edge of the retina. For experiments with contralateral eye control, 4 fields of view per retina, 530 µm square, were acquired of the retina deep plexus, at an intermediate radial distance between the optic disk and peripheral retina. For experiments without a contralateral control, 5 fields of view per mouse were used for quantification.

## Supplementary Notes 4: Quantifying Pericyte and Vascular Phenotype

Pericytes were defined by NG2 cell soma that colocalized with a Col-IV basement membrane- for all stimuli investigated, there were no NG2+ cell somas that were negative for Col-IV. Pericytes were split into several subpopulations based on their morphology relative to the vasculature. Pericytes that had all cell processes and cell soma attached to a vasculature was classified as an attached pericyte. This subpopulation was split further between pericytes connected to an empty basement membrane bridge (negative for endothelial marker and pericyte marker) and those that were not. Pericytes that had a process or cell soma bridging capillaries were classified as pericyte bridges. For pericyte subpopulation densities, the fraction of pericyte bridges is reported as well as the fraction of attached pericytes. Note that this is redundant data (same p values for both subpopulations) since they are fractions that together form the total pericyte population. We reported both values to convey the relative change in effect sizes across study groups.

In Figure 2, thickness of basement membrane segments was measured by manually outlining them in ImageJ, exporting the polygon coordinates into MATLAB, converted into a binary mask, and calculating the diameter using the Euclidean distance transform of the complement of the mask. For Figure 3, the basement membrane segments were thresholded using local background subtraction and diameter calculated with the same method.

# Supplementary Videos 1-2

Included in online supplementary data are files “Online Supplemental Video 1.mp4” and “Online Supplemental Video 2.mp4”, both of which are in vivo timelapse movies of the corneal limbal vessel network 2 days post silver nitrate cornea burn. Images were acquired on a Nikon scanning CLSM with a 10X/0.3 objective. Pericytes were endogenously labeled with tdTomato in the Myh11-RFP mouse model, and vessels were labeled with perfused IB4 lectin. Each frame of the videos are approximately 2.5 minutes apart in time. White arrows annotate migrating pericytes.
